# Supplementary material for: Improving Drug Sensitivity of HIV-1 Protease Inhibitors by Restriction of Cellular Efflux System in a Fission Yeast Model
Source: MDPI journal article supplement (doi:10.3390/pathogens11070804), 2022-07-16
Supplement: s1 [file s1]

**Table S1.** Primers used in this study.

| Name       | Oligonucleotide sequence                                     |
|------------|--------------------------------------------------------------|
| Ble1-PR-F  | AGATCTGTTTAGCTTGCCTCGTCCCCGCCGGGTCAC                         |
| Ble1-PR-R  | GTAACTGCGGTCAAGATATTTCTTGAATCAGG                             |
| AmpR-ori-F | GCTAGCATTATGGTGCACCTCTCAGTACAATC                             |
| AmpR-ori-R | GCTAGCCTGCATTAATGAATCGGCCAACGCG                              |
| ura4-us-F  | CGCGTTGGCCGATTCATTAATGCAGGCTAGCGATTGGAACCTTTGTTTTGCCCAAGG    |
| ura4-us-R  | CCTGATTCAAGAAATATCTTGACCGCAGTTAACCATGTGCAGAGATGCCGACGAAGC    |
| ura4-ds-F  | GTGACCCGGCGGGGACGAGGCAAGCTAAACAGATCTTCGATGCCTTGTTTGC GTTTGTT |
| ura4-ds-R  | AGATTGTACTGAGAGTGCACCATAATGCTAGCCAGCTTGGCATTGTTTCATACAAACG   |
| PR-F       | GTAACTGCGGTCAAGATATTTCTTGAATCAGG                             |
| PR-R       | CTGTCGCGGCCGCTTAAAAATTTAAAGTGCAGCCAA                         |
| ura4-FL-F  | TGCCAGACCGTAATGACAAAACAGC                                    |
| ura4-FL-R  | GCGTAGTGTAGTATTGCTGACATTGGT                                  |

**Note:** F, forward primer; R, reverse primer.
